# Supplementary material
Source: publisher figshare collection journal article supplement (https://tandf.figshare.com/ndownloader/files/20284755)
Supplement: Supplementary file 1 [file 20284755]

## Sheet: Toelichting
	In dit bestand zitten ALLEEN de PAT en SIM artikelen uit de eerste beoordeling.
	De artikelen die eventueel alsnog naar voren komen wanneer van de full tekst artikelen wel versies zijn te vinden in
	Antwerpen of Groningen zijn hier niet in opgenomen.
	IN TABBLAD 'SAMEN' DOEN WE NIETS, dit voegt alleen (via formules, niet handmatig) de scores van de afzonderlijke mensen samen. Om die reden kunnen we het voor de deelnemers als beveiligd tabblad doen.
	De kolommen in tabblad 'samen' kunnen ingeklapt worden zodat je titel en toelichting door mensen overzichtelijker in beeld kan brengen.
	LET OP: de formules gaan ervan uit dat er maar TWEE beoordelaars zijn, waardoor in SAMEN
	altijd maar 2 van de 7 kolommen (van beoordelaars) iets laten zien
	wanneer er door opvoorziene redenen toch een artikel door meer mensen wordt beoordeeld,
	dan komen er drie oordelen en gaat de formule niet meer goed.
	In de versies voor de deelnemers heb ik de kolommen rechts van de titels weggehaald, hele tabblad weg kan niet want
	daarhalen andere bladen de nummers en de titels vandaan.

## Sheet: Finale set kerngegevens
Header for appendix 5 An overview of the included articles: referring letter to the reference list, level of the participants, profession, continent where the study was performed, study design (qualitative, quantitative, mixed methods, other) and quality of the study method. We assessed the quality with the criteria of Joanna Briggs Institute in mind for the different study designs.
Letter reference list	Level of the participants	Profession	Continent	Study design	Quality of the study
A	students	mixed	Europe	qualitative	Good
B	medical students completing their senior years	medicine	Australia	qualitative	Very good
C	students	medicine	Europe	qualitative	Good
D	professionals	nursing	Europe	qualitative	Sufficient
E	students	nursing	Europe	qualitative	Good
F	third-year students	medicine	North America	qualitative	Sufficient
G	first year students	medicine	North America	qualitative	Good
H	students	medicine	North America	mixed methods	Sufficient
I	residents	medicine	North America	qualitative	Good
J	third year students	medicine	North America	qualitative	Sufficient
K	psychiatric resident	medicine	North America	qualitative	Sufficient
L	post-clerkship	medicine	North America	quantitative	Good
M	fourth year undergraduate dentistry students	dentistry	Asia	qualitative	Good
N	first year students	medicine	Europe	qualitative	Good
O	third year students	medicine	North America	qualitative	Very good
P	residents	medicine	North America	qualitative	Sufficient
Q	senior medical students	medicine	Europe	qualitative	Very good
R	primary care residents	medicine	North America	descriptive	Sufficient
S	clerks	medicine	North America	qualitative	Very good
T	students	medicine	North America	qualitative	Very good
U	students in final years	medicine	Europe	qualitative	Good
V	4th year elective	medicine	North America	descriptive	Sufficient
W	students from first four years	medicine	North America	qualitative	Very good
X	third-year students	medicine	North America	mixed methods	Good
Y	third year students	medicine	Australia	qualitative	Good
Z	second-year students	medicine	North America	qualitative	Good
AA	first year residents	medicine	North America	qualitative	Good
BB	Students at different stages in their programs	medicine	North America	mixed methods	Good
CC	students from different professions	medicine	North America	descriptive	Sufficient
DD	third year students	medicine	North America	qualitative	Sufficient
EE	final yeas students	medicine	Europe	mixed methods	Sufficient
FF	students	medicine	North America	qualitative	Sufficient
References
Papers included in the review
A. Anderson ES, Ford J, Thorpe L. 2011. Learning to listen: improving
students’ communication with disabled people. Med Teach. 33(1):
44–52.
B. Barr J, Bull R, Rooney K. 2015. Developing a patient focussed professional
identity: an exploratory investigation of medical students’
encounters with patient partnership in learning. Adv in Health Sci
Educ. 20(2):325–338.
C. Benbassat J, Baumal R. 2001. Teaching doctor-patient interviewing
skills using an integrated, learner and teacher-centered approach.
Am J Med Sci. 322(6):349–357.
D. Bergvik S, Wynn R, Sorlie T. 2008. Nurse training of a patient-centered
information procedure for CABG patients. Patient Educ Couns.
70(2):227–233.
E. Brown J, Nolan M, Davies S. 2008. Bringing caring and competence
into focus in gerontological nursing: a longitudinal, multi-method
study. Int J Nurs Stud. 45(5):654–667.
F. Chretien KC, Swenson R, Yoon B, Julian R, Keenan J, Croffoot J,
Kheirbek R. 2015. Tell me your story: a pilot narrative medicine curriculum
during the medicine clerkship. J Gen Intern Med. 30(7):
1025–1028.
G. Cooksey NR. 2010. Bridging the gap between textbook and maternity
patient: a nurse-developed teaching model for first-year medical
students. Birth. 37(4):325–333.
H. Crump WJ, Fricker RS. 2015. A medical school prematriculation program
for rural students: staying connected with place, cultivating a
special connection with people. Teach Learn Med. 27(4):422–430.
I. DeCaporaleRyan LN, Cornell A, McCann RM, McCormick K, Speice J.
2014. Hospital to home: a geriatric educational program on effective
discharge planning. Gerontol Geriatr Educ. 35(4):369–379.
J. Deen SR, Mangurian C, Cabaniss DL. 2010. Points of contact: Using
first-person narratives to help foster empathy in psychiatric residents.
Acad Psychiatry. 34(6):438–441.
K. Garrison D, Lyness JM, Frank JB, Epstein RM. 2011. Qualitative analysis
of medical student impressions of a narrative exercise in the
third-year psychiatry clerkship. Acad Med. 86(1):85–89.
L. Gaufberg E, Hirsh D, Krupat E, Ogur B, Pelletier S, Reiff D, Bor D.
2014. Into the future: patient-centredness endures in longitudinal
integrated clerkship graduates. Med Educ. 48(6):572–582.
M. Goh EC, Hsu C-S. 2014. Assessing short and long-term educational
impact of visits to hospice via a combination of qualitative methods.
Eur J Dent Educ. 18(2):80–85.
N. Graungaard AH, Andersen JS. 2014. Meeting real patients: a qualitative
study of medical students’ experiences of early patient contact.
Educ Prim Care. 25(3):132–139.
O. Hauer KE, Hirsh D, Ma I, Hansen L, Ogur B, Poncelet AN, Alexander
EK, O’Brien BC. 2012. The role of role: learning in longitudinal integrated
and traditional block clerkships. Med Educ. 46(7):698–710.
P. Hemming P, Teague PJ, Crowe T, Levine R. 2016. Chaplains on the
medical team: a qualitative analysis of an interprofessional curriculum
for internal medicine residents and chaplain interns. J Relig
Health. 55(2):560–571.
Q. Henriksen AH, Ringsted C. 2014. Medical students’ learning from
patient-led teaching: Experiential versus biomedical knowledge.
Adv in Health Sci Educ. 19(1):7–17.
R. Katz AM, Conant L Jr, Inui TS, Baron D, Bor D. 2000. A council of
elders: creating a multi-voiced dialogue in a community of care.
Soc Sci Med. 50(6):851–860.
S. Konkin J, Suddards C. 2012. Creating stories to live by: Caring and
professional identity formation in a longitudinal integrated clerkship.
Adv in Health Sci Educ. 17(4):585–596.
T. Kumagai AK, Murphy EA, Ross PT. 2009. Diabetes stories: Use of
patient narratives of diabetes to teach patient-centered care. Adv in
Health Sci Educ. 14(3):315–326.
U. Lutz G, Scheffer C, Edelhaeuser F, Tauschel D, Neumann M. 2013. A
reflective practice intervention for professional development,
reduced stress and improved patient care–a qualitative developmental
evaluation. Patient Educ Couns. 92(3):337–345.
V. Martinez R. 2002. The nature of illness experience: A course on
boundaries. Theor Med Bioeth. 23(3):259–269.
W. Ogur B, Hirsh D. 2009. Learning through longitudinal patient carenarratives
from the Harvard medical school-Cambridge integrated
clerkship. Acad Med. 84(7):844–850.
X. Saba GW, Chou CL, Satterfield J, Teherani A, Hauer K, Poncelet A,
Chen HC. 2014. Teaching patient-centered communication skills: a
telephone follow-up curriculum for medical students. Med Educ
Online. 19(1):22522.
Y. Selzer R, Tallentire VR, Foley F. 2015. The effects of utilizing a nearpatient
e-learning tool on medical student learning. Med Teach.
37(6):558–565.
Z. Shapiro D, Tomasa L, Koff NA. 2009. Patients as teachers, medical
students as filmmakers: the video slam, a pilot study. Acad Med.
84(9):1235–1243.
AA. Tait GR, Hodges BD. 2013. Residents learning from a narrative
experience with dying patients: a qualitative study. Adv in Health
Sci Educ. 18(4):727–743.
BB. Towle A, Godolphin W. 2013. Patients as educators:
Interprofessional learning for patient-centred care. Med Teach.
35(3):219–225.
CC. Towle A, Brown H, Hofley C, Kerston RP, Lyons H, Walsh C. 2014.
The expert patient as teacher: an interprofessional health mentors
programme. Clin Teach. 11(4):301–306.
DD. Vail R, Mahon-Salazar C, Morrison A, Kalet A. 1996. Patients as
teachers: an integrated approach to teaching medical students
about the ambulatory care of HIV infected patients. Patient Educ
Couns. 27(1):95–101.
EE. Yardley S, Hookey C, Lefroy J. 2013. Designing whole-task learning
opportunities for integrated end-of-life care: a practitioner-derived
enquiry. Educ Prim Care. 24(6):436–443.
FF. Zink T, Halaas GW, Brooks KD. 2009. Learning professionalism during
the third year of medical school in a 9-month-clinical rotation
in rural Minnesota. Med Teach. 31(11):1001–1006.
